# Supplementary material for: High temperature orbital order melting in KCrF3 perovskite
Source: Royal Society of Chemistry journal article supplement (doi:10.1039/b700487g), 2007-01-01
Supplement: b700487g.pdf [file b700487g.pdf]

# Supporting Information for “High Temperature orbital order melting in the $\text{KCrF}_3$ Perovskite”

Serena Margadonna\* and Georgios Karotsis

*School of Chemistry and Centre for Science at Extreme Conditions, University of Edinburgh,  
Edinburgh EH9 3JJ, UK.*

**Table S1.** Refined parameters and selected bond distances for  $\text{KCrF}_3$  as obtained by Rietveld refinement of the synchrotron X-ray powder diffraction data at 298 K in the space group  $I4/mcm$  with unit cell parameters,  $a = 6.05377(1) \text{ \AA}$  and  $c = 8.02356(1) \text{ \AA}$  (agreement factors:  $R_{\text{wp}} = 4.83\%$ ,  $R_{\text{exp}} = 3.42\%$ ).

| Atom               | $n$        | $x$       | $y$       | $z$ | Position | $B_{\text{iso}} (\text{\AA}^2)$ |
|--------------------|------------|-----------|-----------|-----|----------|---------------------------------|
| K                  | 1          | 0         | 0         | 1/4 | 4a       | 1.49(2)                         |
| Cr                 | 1          | 0         | 1/2       | 0   | 4d       | 0.66(1)                         |
| F(1)               | 1          | 0         | 1/2       | 1/4 | 4b       | 1.94(4)                         |
| F(2)               | 1          | 0.2301(2) | 0.7301(2) | 0   | 8h       | 2.12(3)                         |
| Selected Distances |            |           |           |     |          |                                 |
| Cr-F(1)            | 2.00589(1) |           |           |     |          |                                 |
| Cr-F(2)            | 1.970(2)   |           |           |     |          |                                 |
| Cr-F(2)            | 2.311(2)   |           |           |     |          |                                 |

**Table S2.** Refined parameters and selected bond distances for  $\text{KCrF}_3$  as obtained by Rietveld refinement of the synchrotron X-ray powder diffraction data at 973 K in the space group  $Pm-3m$  with unit cell parameters,  $a = 4.231800(3) \text{ \AA}$  (agreement factors:  $R_{\text{wp}} = 4.98\%$ ,  $R_{\text{exp}} = 3.12\%$ ).

| Atom               | $n$         | $x$ | $y$ | $z$ | Position | $B_{\text{iso}} (\text{\AA}^2)$ |
|--------------------|-------------|-----|-----|-----|----------|---------------------------------|
| K                  | 1           | 1/2 | 1/2 | 1/2 | 1b       | 5.1(4)                          |
| Cr                 | 1           | 0   | 0   | 0   | 1a       | 2.71(2)                         |
| F(1)               | 1           | 1/2 | 0   | 0   | 3d       | 6.04(8)                         |
| Selected Distances |             |     |     |     |          |                                 |
| Cr-F(1)            | 2.115900(2) |     |     |     |          |                                 |
